# Supplementary material
Source: publisher figshare collection journal article supplement (https://gsapubs.figshare.com/ndownloader/files/22757294)
Supplement: Supplementary file 1 [file 22757294]

## SAMPLE SELECTION AND STABLE ISOTOPE ANALYSIS

Data and observations presented herein are part of a Ph.D. thesis, and are based on the detailed petrographic analysis of numerous barite-bearing specimens, selected from over 800 samples, from outcrop, drill core, and the initial open pit and collected during several extensive detailed mapping campaigns.

Selected samples were systematically studied at the hand-sample, binocular microscope, and thin-section scales, and the morphology, grain-size, opacity, mineral association, and paragenetic context of barite (and acanthite) in each sample was recorded, together with the degree of bleaching of the host-rock. This analysis led to the division of barite at Pierina into two paragenetically and morphologically distinct groups, from which twenty barite±acanthite occurrences representative of both populations were selected for stable isotope analysis.

Barite and acanthite separates were hand-picked from samples to ensure their exact paragenetic context. Sulfur was extracted on-line with continuous-flow technology, using a Finnigan MAT 252 isotope ratio mass spectrometer coupled to a Carlo Erba Elemental Analyser: NCS 2500. Barite was powdered and mixed with granular  $V_2O_5$  to ensure complete combustion. Sulfate oxygen was extracted using continuous-flow technology and a Thermo Finnigan Thermal Conversion Elemental Analyser (TCEA). All values are given in units per mil (‰). Sulfur is reported relative to CDT and oxygen relative to V-SMOW. Analytical precision for both  $\delta^{34}S$  and  $\delta^{18}O$  values is  $\sim 0.3$  ‰.

TABLE DR1. SAMPLE LOCATIONS, ISOTOPIC DATA, PARAGENETIC STAGE, AND DESCRIPTION OF BARITE AND ACANTHITE FROM THE PIERINA DEPOSIT

| Sample | Mineral   | Easting | Northing | Elevation<br>(m a.s.l.) | * <sup>34</sup> S<br>(‰) | * <sup>18</sup> O<br>(‰) | Paragenetic<br>stage | Relation of barite to oxides*   | Barite crystal form   | Average<br>crystal size | Additional comments                         |
|--------|-----------|---------|----------|-------------------------|--------------------------|--------------------------|----------------------|---------------------------------|-----------------------|-------------------------|---------------------------------------------|
| B1     | barite    | 216076  | 8955750  | 3910                    | 28.5                     | 10.4                     | II                   | undetermined, not with oxides   | prismatic             | 8-9 mm                  | translucent, cloudy                         |
| 45     | barite    | 216174  | 8955609  | 3910                    | 26.2                     | 5.8                      | II                   | undetermined (vein)             | prismatic             | 3-8 mm                  | translucent, cloudy, with pyrite inclusions |
| 93     | barite    | 216160  | 8955807  | 3877                    | 24.9                     | 10.9                     | II                   | pre                             | prismatic             | 5-6 mm                  | translucent, cloudy, with pyrite inclusions |
| 165    | barite    | 216126  | 8955787  | 3888                    | 23.6                     | 10.6                     | II                   | pre (in sulfide zone)           | tabular to prismatic  | 2-3 mm                  | translucent, cloudy, with pyrite inclusions |
| 545    | barite    | 216095  | 8955684  | 3907                    | 27.4                     | 7.9                      | II                   | pre (in sulfide zone)           | prismatic             | 2-6 mm                  | translucent, cloudy, with pyrite inclusions |
| 560    | barite    | 216095  | 8955684  | 3876                    | 24.6                     | 8.5                      | II                   | pre                             | prismatic             | 2-6 mm                  | translucent, cloudy, with pyrite inclusions |
| A3     | barite    | 216155  | 8955475  | 3935                    | 1.4                      | -2.8                     | III                  | post                            | prismatic/bipyramidal | <1 mm                   | clear                                       |
| A3     | barite    | 216155  | 8955475  | 3935                    | 1.8                      | -2.4                     | III                  | post                            | prismatic             | 3-6 mm                  | clear-to-translucent                        |
| 91     | barite    | 216181  | 8955676  | 3897                    | 14.1                     | 4.7                      | III                  | undetermined (in bleached area) | prismatic/bipyramidal | 2-3 mm                  | clear, colorless                            |
| 91     | acanthite | 216181  | 8955676  | 3897                    | 3.9                      | N.A <sup>†</sup>         | III                  | N.A                             | N.A                   |                         | N.A                                         |
| 93     | barite    | 216160  | 8955807  | 3877                    | 5.8                      | 2.4                      | III                  | post                            | prismatic/bipyramidal | <1 mm                   | clear, colorless                            |
| 305    | barite    | 216106  | 8955639  | 3925                    | 14.2                     | 3.9                      | III                  | undetermined (in bleached area) | prismatic/bipyramidal | 2-3 mm                  | clear, colorless                            |
| 305    | acanthite | 216106  | 8955639  | 3925                    | 3.8                      | N.A                      | III                  | N.A                             | N.A                   |                         | N.A                                         |
| 546    | barite    | 216095  | 8955684  | 3903                    | 11.8                     | 2.3                      | III                  | undetermined (in bleached area) | prismatic/bipyramidal | <2 mm                   | clear, colorless                            |
| 547    | barite    | 216095  | 8955684  | 3902                    | 4.4                      | 3.1                      | III                  | post                            | prismatic/bipyramidal | <1 mm                   | clear, colorless                            |
| 550    | barite    | 216095  | 8955684  | 3900                    | 8.0                      | 0.2                      | III                  | post, and in bleached area      | prismatic/bipyramidal | <2 mm                   | clear, colorless                            |
| 552    | barite    | 216095  | 8955684  | 3899                    | 12.3                     | 3.2                      | III                  | post, and in bleached area      | prismatic/bipyramidal | 2-3 mm                  | clear, colorless                            |
| 552    | acanthite | 216095  | 8955684  | 3899                    | 2.6                      | N.A                      | III                  | N.A                             | N.A                   |                         | N.A                                         |
| 553    | barite    | 216095  | 8955684  | 3897                    | 4.8                      | -1.2                     | III                  | post                            | prismatic/bipyramidal | 1-2 mm                  | clear, colorless                            |
| 553    | acanthite | 216095  | 8955684  | 3897                    | 2.0                      | N.A                      | III                  | N.A                             | N.A                   |                         | N.A                                         |
| 557a   | barite    | 216095  | 8955684  | 3888                    | 12.2                     | 3.2                      | III                  | post                            | prismatic             | 3-4 mm                  | clear, colorless                            |
| 557b   | barite    | 216095  | 8955684  | 3888                    | 4.6                      | -0.8                     | III                  | post                            | prismatic/bipyramidal | <1 mm                   | clear, colorless                            |
| 557b   | acanthite | 216095  | 8955684  | 3888                    | 0.4                      | N.A                      | III                  | N.A                             | N.A                   |                         | N.A                                         |
| 563    | barite    | 216095  | 8955684  | 3868                    | 9.1                      | 0.2                      | III                  | post, and in bleached area      | prismatic/bipyramidal | <2 mm                   | clear, colorless                            |
| 566    | barite    | 216095  | 8955684  | 3854                    | 11.8                     | 2.0                      | III                  | post                            | prismatic/bipyramidal | <2 mm                   | clear, colorless                            |

\*pre refers to barite overgrown by oxides; post refers to barite that is overgrowing oxides.

<sup>†</sup>N.A=not applicable.
